# Supplementary material for: Comparative study of leaf nutrient reabsorption by two different ecotypes of wild soybean under low-nitrogen stress
Source: PeerJ. 2023 Jun 27;11:e15486. doi: 10.7717/peerj.15486 (PMC10312162; doi:10.7717/peerj.15486)
Supplement: Supplemental Information 1 [file peerj-11-15486-s001.xlsx]

## Sheet: Sheet1
	CK (Mmol L-1)	LN (Mmol L-1)
Ca (NO3)2·4H2O	3.4775	0.8694
MgSO4·7H2O	2.5049	0.6262
KH2PO4	2.0015	0.5004
KNO3	5.0059	1.2515
Na-EDTA	0.02	0.02
FeSO4·7H2O	0.02	0.02
H3BO3	0.0461	0.0461
MnSO4	0.0067	0.0067
CuSO4·5H2O	0.0003	0.0003
ZnSO4·7H2O	0.0008	0.0008
H2MoO4	0.0006	0.0006
CaCl2·2H2O	0	2.6082
KCl	0	5.2556
