# Supplementary material for: Comparative study of leaf nutrient reabsorption by two different ecotypes of wild soybean under low-nitrogen stress
Source: PeerJ. 2023 Jun 27;11:e15486. doi: 10.7717/peerj.15486 (PMC10312162; doi:10.7717/peerj.15486)
Supplement: Supplemental Information 2 — Values are presented as mean ± standard deviation of four biological replicates; GS1, common wild soybean; GS2, low nitrogen-tolerant wild soybean; CK, control treatment; LN, low nitrogen stress; Significant differences between controls and LN treatments were determined by the One-Way ANOVA test and marked as “*” (p < 0.05) and “**” (p < 0.01). [file peerj-11-15486-s002.xlsx]

## Sheet: Sheet1
parameters	GS1			GS2
	CK	LN	log2(LN/CK)	CK	LN	log2(LN/CK)
Shoot height（cm）	117.00 ± 0.18	108.00 ± 0.20	−0.12*	126.00 ± 0.02	124.00 ± 0.31	−0.02
Root length（cm）	30.50 ± 0.10	31.50 ± 0.08	0.05*	32.00 ± 0.09	35.50 ± 0.04	0.15*
Shoot DW（g）	9.98 ± 0.13	5.28 ± 0.02	−0.92**	11.30 ± 0.03	7.92 ± 0.00	−0.51*
Root DW（g）	1.37 ± 0.25	1.07 ± 0.30	−0.36**	1.57 ± 0.02	1.30 ± 0.01	−0.27*
