# Supplementary material for: Comparative study of leaf nutrient reabsorption by two different ecotypes of wild soybean under low-nitrogen stress
Source: PeerJ. 2023 Jun 27;11:e15486. doi: 10.7717/peerj.15486 (PMC10312162; doi:10.7717/peerj.15486)
Supplement: Supplemental Information 3 [file peerj-11-15486-s003.xlsx]

## Sheet: Sheet1
Young leaves			Old leaves
Ion	PC1	PC2	PC1	PC2
Cl-	0.365301	-0.0821835	-0.397521	0.021447
NO3−	-0.189781	0.626966	0.411337	-0.0175837
H2PO4−	0.240797	-0.220259	-0.281851	-0.157048
SO42−	-0.120376	0.289924	0.144006	0.76856
C2O42−	0.22197	0.260816	0.0192414	-0.127335
Mn﻿2+	0.299585	0.359118	-0.0538686	0.391831
B3+	0.532247	0.0895397	-0.421594	0.122
Fe3+	0.395622	0.0256362	-0.24129	0.188122
Zn2+	0.353688	0.241178	-0.37355	0.100768
Na+	0.0510175	-0.253266	-0.180831	0.326359
Mg2+	-0.0494456	0.243469	0.182877	0.148147
Ca2+	0.0348952	-0.0400568	0.212499	0.094631
K+	-0.060433	-0.124982	0.00876701	-0.0667582
P5+	0.2103	-0.251219	-0.287142	-0.108806
