# Supplementary material for: Comparative study of leaf nutrient reabsorption by two different ecotypes of wild soybean under low-nitrogen stress
Source: PeerJ. 2023 Jun 27;11:e15486. doi: 10.7717/peerj.15486 (PMC10312162; doi:10.7717/peerj.15486)
Supplement: Supplemental Information 4 [file peerj-11-15486-s004.xlsx]

## Sheet: Sheet1
metabolite name	PC1	PC2	PC3
Valine	0.16838	0.026743	0.018975
Isoleucine	0.1617	-0.080571	0.057409
Aspartic Acid	0.12493	0.042837	-0.11844
Asparagine	-0.005971	-0.092243	0.15714
L-Homoserine	0.13831	-0.15935	-0.058223
L-Allothreonine	0.10953	0.13707	0.065036
Serine	0.14933	0.035806	0.02482
Proline	0.12613	-0.045584	-0.070522
Alanine	0.20641	-0.050091	-0.083723
Glycine	0.049336	0.18617	-0.13738
Phenylalanine	0.023447	0.22196	0.07376
4-Aminobutyric Acid	0.15542	-0.0040288	0.022391
Ethanolamine	0.055556	0.1931	-0.075192
D-Mannosamine	-0.11469	-0.067194	-0.16806
Sphingosine	0.12649	0.065825	-0.037161
3-Aminoisobutyric Acid	0.18509	-0.070936	-0.050633
5-Aminovaleric Acid	0.13351	-0.089189	-0.13289
2-Hydroxypyridine	-0.036568	0.25054	0.1406
Sucrose	-0.079956	-0.21659	-0.31981
Maltose	0.077142	-0.11773	-0.17355
Maltotriose	0.13004	0.0029212	0.011139
Melezitose	0.14993	0.018068	0.05564
Threitol	0.1775	0.16463	0.21536
Galactinol	-0.15596	0.12956	-0.020013
Glycerol	0.16902	0.02148	0.0044289
Myo-Inositol	-0.18789	0.044357	-0.058077
L-Threose	0.099567	0.20789	-0.11056
Xylose	0.15258	0.066409	0.0058647
Cellobiose	0.17328	-0.043343	-0.015566
Lactulose	0.17797	0.037849	-0.010017
D-Arabitol	0.13652	-0.14613	-0.11828
Glucose-6-Phosphate	-0.047705	0.13521	-0.061308
Fructose 2,6-Biphosphate	0.16292	0.050269	0.034718
Maltose	0.14194	0.03836	0.031548
Glycolic Acid	0.11333	-0.12181	-0.23058
Lactic Acid	0.1299	0.032019	-0.06952
Methylmalonic Acid	0.10461	0.10883	-0.15025
Mucic Acid	0.12642	0.017845	-0.11042
D-Glyceric Acid	0.047663	0.20975	-0.12603
Pyruvic Acid	0.11358	-0.044999	0.083815
Succinic Acid	0.10111	-0.081824	-0.083096
Fumaric Acid	-0.079523	-0.012714	-0.047257
Citramalic Acid	0.13456	-0.035351	0.02363
Oxalic Acid	-0.084697	0.24407	0.10836
Itaconic Acid	0.17329	-0.0047974	0.0046821
Malonic Acid	-0.013252	-0.011189	-0.15393
Maleic Acid	-0.079697	0.23325	0.18497
Gluconic Acid	0.11615	-0.018343	-0.1482
Nicotinic Acid	0.030057	0.21191	-0.094938
Threonic Acid	-0.16232	0.1569	-0.11664
Galactonic Acid	0.14476	0.0086882	0.1685
Glucoheptonic Acid	-0.037472	-0.36651	0.26449
3-Hydroxypropionic Acid	-0.01556	0.27337	-0.28532
Shikimic Acid	-0.13816	-0.10639	0.0064208
Stearic Acid	-0.14067	-0.11144	-0.19781
Palmitic Acid	0.13472	-0.10296	0.18138
Linolenic Acid	-0.16214	-0.099416	-0.15566
Linoleic Acid	0.073318	0.046725	-0.10411
Ferulic Acid	-0.13516	0.019544	-0.20928
Neohesperidin	-0.11855	-0.04501	0.15345
Salicylic Acid	0.03176	-0.0090443	-0.071645
Prunin	-0.15378	0.015477	0.13813
Caffeic Acid	-0.1095	0.012489	-0.030133
