# Supplementary material for: Comparative study of leaf nutrient reabsorption by two different ecotypes of wild soybean under low-nitrogen stress
Source: PeerJ. 2023 Jun 27;11:e15486. doi: 10.7717/peerj.15486 (PMC10312162; doi:10.7717/peerj.15486)
Supplement: Supplemental Information 5 [file peerj-11-15486-s005.xlsx]

## Sheet: Sheet1
metabolite name	PC1	PC2	PC3
L-Proline	0.16284	0.15284	-0.14016
Glycine	-0.11465	-0.0068212	-0.16097
Sarcosine	-0.056208	0.1544	-0.16502
L-Homoserine	-0.069935	0.11746	-0.13129
L-Aspartic acid	0.13507	0.19804	-0.06183
L-Alanine	-0.029257	0.1582	-0.054849
L-Asparagine	0.12105	0.13782	-0.032875
L-Valine	-0.11964	0.0077559	-0.03051
Cycloleucine	-0.16601	0.015303	0.022758
L-Isoleucine	0.037553	0.1491	-0.059613
Beta-Alanine	0.10553	-0.05925	0.013853
L-Phenylalanine	0.14665	0.054004	0.013093
L-Serine	0.28534	0.062806	0.026066
Threonine	0.16994	0.015016	0.027402
Sphingosine	0.03439	-0.36304	-0.13625
Gamma-Aminobutyric acid	0.045396	-0.16225	-0.038194
Ethanolamine	-0.16465	0.055957	-0.0057108
D-Galactose	-0.019243	0.056448	-0.37841
Alpha-Lactose	0.081536	-0.25937	-0.26489
Gluconic acid	-0.077329	0.12394	-0.035138
L-Threose	-0.23723	0.0067614	-0.040467
D-Maltose	0.14125	0.042832	-0.074279
D-Xylose	-0.19408	0.024735	-0.049174
Sucrose	-0.032136	-0.3014	-0.013772
Glycerol	-0.029013	0.072259	0.010257
D-Arabitol	0.17242	0.087555	0.16342
Malonic acid	0.12781	-0.12744	-0.10311
5-Aminopentanoic acid	-0.078714	-0.37901	0.13229
Palmitic acid	-0.10304	0.10665	-0.18309
Stearic acid	-0.093366	0.053303	-0.11897
Pelargonic acid	0.11531	0.050676	-0.077029
Linoleic acid	-0.26423	0.073117	-0.020588
Alpha-Linolenic acid	0.19267	-0.055294	-0.054906
beta-D-Fructose 6-phosphate	0.091349	0.088221	-0.18904
Pyruvic acid	-0.11768	0.091562	0.067437
Glucose 6-phosphate	-0.12832	0.015778	0.21259
Fumaric acid	0.12298	-0.0056158	-0.17406
L-Malic acid	-0.1252	0.010644	0.013458
Succinic acid	-0.010916	0.042403	0.13186
Itaconic acid	0.028066	-0.29792	-0.094162
L-Lactic acid	-0.087084	-0.0033596	-0.069728
Maleic acid	0.087467	0.16241	0.05312
Caffeic acid	-0.1936	-0.039007	0.03311
Glycolic acid	0.11686	-0.15841	0.077645
Galactaric acid	0.11177	0.0024586	0.079089
Benzoic acid	0.13252	-0.06162	0.33571
Glyceric acid	-0.31001	0.011415	0.23099
Shikimic acid	0.13889	0.035239	-0.14241
trans-Ferulic acid	-0.006321	-0.13241	0.023474
Salicylic acid	-0.20312	0.093567	0.0069757
Prunin	-0.18335	0.058305	-0.12957
Neohesperidin	0.037377	0.20328	-0.14375
Vanillin	0.15119	0.21891	0.38884
Neohesperidin	0.0647541	-0.0442265	-0.00302
trans-Ferulic acid	0.0254652	-0.0785551	-0.1335
Salicylic acid	0.0417321	-0.0165073	0.02077
Prunin	0.0227256	0.0127524	0.015119
