# Supplementary material for: Comparative study of leaf nutrient reabsorption by two different ecotypes of wild soybean under low-nitrogen stress
Source: PeerJ. 2023 Jun 27;11:e15486. doi: 10.7717/peerj.15486 (PMC10312162; doi:10.7717/peerj.15486)
Supplement: Supplemental Information 6 [file peerj-11-15486-s006.xlsx]

## Sheet: Sheet1
		GS1						GS2
		CK-1	CK-2	CK-3	LN-1	LN-2	LN-3	CK-1	CK-2	CK-3	LN-1	LN-2	LN-3
YL	Nitrogen(%)	5.65	5.94	5.27	4.53	5.33	5.53	5.53	6.05	5.4	6.12	6.16	6.2
	Carbon(%)	39.95	43.39	38.49	34.42	39.67	41.8	41.9	42.3	37.12	43.16	43.4	43.16
	C/N	7.2	7.31	7.18	7.5	7.61	7.51	7.08	7.24	7.1	7.01	7.08	7
OL	Nitrogen(%)	5.12	4.97	4.94	3.9	3.66	4.26	4.93	4.68	4.7	4.35	4.49	4.3
	Carbon(%)	40.24	40.34	40.5	37.2	39.82	36.38	40.03	43	37.75	41.35	41.3	42
	C/N	7.9	8.25	8.03	9.6	9.3	9.9	8.2	8.77	8.32	9.5	9.7	9.3
