# Supplementary material for: Comparative study of leaf nutrient reabsorption by two different ecotypes of wild soybean under low-nitrogen stress
Source: PeerJ. 2023 Jun 27;11:e15486. doi: 10.7717/peerj.15486 (PMC10312162; doi:10.7717/peerj.15486)
Supplement: Supplemental Information 7 [file peerj-11-15486-s007.xlsx]

## Sheet: Sheet1
		GS1						GS2
		CK-1	CK-2	CK-3	LN-1	LN-2	LN-3	CK-1	CK-2	CK-3	LN-1	LN-2	LN-3
YL	Pn	7.8	5.4	4.4	3.1	4.5	3.7	11.4	3.9	4.3	6.1	3.6	6.7
	gs	904	532	235	656	668	1431	568	900	609	1702	385	1332
	E	6.24	7	6.5	7.6	7.5	9.4	7.2	7.9	7.2	9.7	7	9.9
	Ci/Ca	0.90192	0.903044	0.86546	0.934991	0.922997	0.94745	0.856842	0.86026	0.879389	0.932642	0.906501	0.921087
OL	Pn	5.6	10.6	8.1	4.4	3.4	4.7	14.2	17.6	13	13.1	6.9	3.8
	gs	480	1410	811	827	454	1099	1458	2341	1594	1096	1015	1535
	E	6.8	9.5	8.1	7.6	6.3	8.5	9.2	9.8	9.4	9.1	7.5	6.1
	Ci/Ca	0.893997	0.898876	0.896359	0.932884	0.92136	0.934579	0.875969	0.8905	0.885677	0.937758	0.922068	0.915971
