# Supplementary material for: Comparative study of leaf nutrient reabsorption by two different ecotypes of wild soybean under low-nitrogen stress
Source: PeerJ. 2023 Jun 27;11:e15486. doi: 10.7717/peerj.15486 (PMC10312162; doi:10.7717/peerj.15486)
Supplement: Supplemental Information 8 [file peerj-11-15486-s008.xlsx]

## Sheet: Sheet1
		GS1								GS2
		CK-1	CK-2	CK-3	CK-4	LN-1	LN-2	LN-3	LN-4	CK-1	CK-2	CK-3	CK-4	LN-1	LN-2	LN-3	LN-4
YL	Chl a	7.39608	6.90758	10.1419	9.48185	5.31028	6.59164	6.04856	7.31683	11.2007	11.1111	12.828	14.0466	10.735	10.4988	9.54862	12.5941
	Chl b	2.91823	2.03137	4.37936	4.44299	1.87686	2.03484	2.25942	3.39037	3.6247	3.00927	4.23437	4.95611	3.7622	4.0069	3.55069	4.77326
	Chl a+b	10.3226	9.94771	14.5331	12.9345	7.19281	9.63504	8.3146	9.71415	14.8369	15.1329	17.0756	17.0152	14.5086	15.5179	13.1097	15.3787
	Chl c	1.9661	1.03802	2.25558	3.08657	1.56541	1.00444	1.74366	2.77117	2.17416	1.41369	2.62117	3.40301	1.94758	2.17007	1.72621	2.94795
OL	Chl a	15.9486	15.7764	16.151	17.292	10.9598	8.83038	10.0005	11.2636	12.7014	11.546	12.8099	13.6858	8.2732	7.29871	8.09127	9.22106
	Chl b	7.10998	5.59082	7.28621	7.99567	4.07447	2.45869	3.50354	4.6789	4.90222	3.74559	5.03926	5.89569	3.40245	2.26459	3.4051	4.35738
	Chl a+b	23.0775	22.386	23.4565	24.3066	15.0462	12.2995	13.5147	14.9535	17.6177	16.3053	17.8635	18.5955	11.6851	10.5726	11.5057	12.5878
	Chl c	2.66061	1.55916	2.6952	3.63832	3.17444	1.83031	2.83837	3.94771	3.10502	2.07605	3.02506	4.06871	2.25825	1.37291	2.34859	3.32658
