# Supplementary material for: Comparative study of leaf nutrient reabsorption by two different ecotypes of wild soybean under low-nitrogen stress
Source: PeerJ. 2023 Jun 27;11:e15486. doi: 10.7717/peerj.15486 (PMC10312162; doi:10.7717/peerj.15486)
Supplement: Supplemental Information 9 [file peerj-11-15486-s009.xlsx]

## Sheet: Sheet1
	concentration (mmol. L-1)
	GS1																GS2
	YL								OL								YL								OL
	CK 1	CK 2	CK3	CK4	LN 1	LN 2	LN3	LN4	CK 1	CK 2	CK3	CK4	LN 1	LN 2	LN3	LN4	CK 1	CK 2	CK3	CK4	LN 1	LN 2	LN3	LN4	CK 1	CK 2	CK3	CK4	LN 1	LN 2	LN3	LN4
Cl-	2.61815	2.16548	2.49181	2.29181	4.33078	4.61138	4.67108	4.27108	2.84564	2.12738	2.38651	2.58651	8.26054	7.28194	7.57124	7.97124	2.69434	1.85293	2.174	2.37364	4.46845	5.39684	4.73264	5.13264	1.78712	1.86507	1.62609	2.02609	8.00088	7.83387	7.41737	8.41737
NO3-	1.97902	2.53153	2.26528	2.24528	1.37743	1.41682	1.40712	1.38712	3.93273	3.9798	4.05627	3.85627	0.934728	0.911156	1.02294	0.822942	3.58807	3.41876	3.60342	3.40342	2.44317	2.5101	2.57663	2.37663	4.2912	4.18142	4.33631	4.13631	1.21229	1.27441	1.14335	1.34335
H2PO4-	17.9258	19.2053	18.5756	18.5556	29.5863	34.3424	31.9744	31.9544	20.5886	20.5768	20.6827	20.4827	47.6534	44.4319	46.1426	45.9426	21.502	17.9373	19.8197	19.6197	22.585	24.1079	23.4464	23.2464	17.1865	15.0055	16.196	15.996	24.5802	25.4368	24.9085	25.1085
SO42-	25.6073	26.6098	26.1185	26.0985	23.8888	23.2965	23.6026	23.5826	2.15262	2.17178	2.1322	2.1722	2.53042	3.05537	2.89289	2.69289	33.7926	29.2075	31.6	31.4	24.6967	20.9935	25.9451	31.7451	58.6811	52.1074	55.4942	55.2942	27.35	28.7929	27.9715	28.1715
C2O42-	0.891986	1.1653	1.03864	1.01864	1.70143	1.74131	1.73137	1.71137	1.38472	1.27235	1.34853	1.30853	1.29588	1.38079	1.43833	1.23833	1.59413	1.56034	1.67723	1.47723	1.85046	1.53311	1.79178	1.59178	1.09187	1.42023	1.35605	1.15605	1.19317	1.09656	1.04487	1.24487
Mn2+	0.0802975	0.091235	0.0867662	0.0847662	0.129374	0.128192	0.129783	0.127783	0.113813	0.119017	0.126415	0.106415	0.160474	0.16038	0.260427	0.0604268	0.113292	0.115811	0.124551	0.104551	0.193035	0.215908	0.214472	0.194472	0.290863	0.152271	0.231567	0.211567	0.275834	0.319704	0.307769	0.287769
B3+	0.323521	0.368826	0.347174	0.345174	1.60363	1.62769	1.61666	1.61466	1.01904	1.15816	1.0886	1.0886	4.77973	4.94669	4.96321	4.76321	0.503012	0.563791	0.543401	0.523401	1.70051	2.03639	1.87845	1.85845	1.48369	0.867999	1.18584	1.16584	4.54237	5.32799	4.94518	4.92518
Fe2+	0.050981	0.056962	0.0549715	0.0529715	0.130622	0.111679	0.12215	0.12015	0.040582	0.047266	0.040924	0.046924	0.086081	0.086811	0.096446	0.076446	0.065948	0.058938	0.072443	0.052443	0.122584	0.138739	0.140662	0.120662	0.073883	0.044366	0.0691245	0.0491245	0.083994	0.10592	0.104957	0.084957
Zn2+	0.124656	0.148174	0.126415	0.146415	0.20761	0.25892	0.268265	0.218265	0.0881125	0.0962035	0.090158	0.094158	0.346471	0.354457	0.350464	0.350064	0.173328	0.163298	0.178313	0.158313	0.331672	0.371511	0.361592	0.341592	0.139046	0.0876645	0.123355	0.103356	0.270759	0.305493	0.298126	0.278126
Na+	2.18032	2.11274	2.14753	2.14553	1.91636	2.17547	2.05591	2.03591	0.955878	1.06231	1.10909	0.909092	1.71487	1.92412	1.9195	1.7195	1.45427	1.83403	1.65415	1.63415	2.45278	1.70763	2.09021	2.07021	2.03582	1.47518	1.7655	1.7455	2.56629	2.9521	2.7692	2.7492
Mg2+	28.3581	28.2414	28.2897	28.3097	26.1704	26.7889	26.4896	26.4696	46.1215	46.6711	46.4963	46.2963	32.8398	33.7138	33.3768	33.1768	29.4525	30.8301	30.1513	30.1313	31.8223	27.3141	29.5782	29.5582	79.6129	41.6343	60.6336	60.6136	38.6895	46.2794	42.4944	42.4744
Ca2+	14.602	14.6108	14.5964	14.6164	13.8756	14.1256	14.0106	13.9906	48.6275	49.2914	49.0594	48.8594	31.18	31.4606	31.4203	31.2203	13.2567	13.614	13.4454	13.4254	15.9806	13.9561	14.9784	14.9584	77.532	39.982	58.767	58.747	37.2042	40.5816	38.9029	38.8829
K+	178.978	204.34	191.649	191.669	168.833	170.308	169.581	169.561	163.583	163.306	163.545	163.345	170.873	174.308	172.691	172.491	163.559	170.831	167.205	167.185	161.124	186.927	174.036	174.016	208.55	124.727	166.648	166.628	132.462	150.087	141.285	141.265
