# Supplementary material for: Comparative study of leaf nutrient reabsorption by two different ecotypes of wild soybean under low-nitrogen stress
Source: PeerJ. 2023 Jun 27;11:e15486. doi: 10.7717/peerj.15486 (PMC10312162; doi:10.7717/peerj.15486)
Supplement: Supplemental Information 10 [file peerj-11-15486-s010.xlsx]

## Sheet: Sheet1
	W1								W2
Metabolite name	CK1	CK2	CK3	CK4	LN1	LN2	LN3	LN4	CK1	CK2	CK3	CK4	LN1	LN2	LN3	LN4
Valine	0.0063	0.0061	0.006	0.0063	0.0057	0.0052	0.0053	0.0054	10.9885	7.3555	6.9871	7.299	7.8947	6.5628	6.8763	6.855
Isoleucine	0.0032	0.0041	0.0045	0.0037	0.0013	0.0009	0.001	0.0011	1.0063	2.1626	1.7482	1.0447	3.2537	2.3517	2.9182	2.5259
Aspartic Acid	0.0381286	0.0546165	0.0662411	0.0529954	0.0905213	0.0965213	0.078529	0.108514	6.8954	7.0912	7.2992	9.1284	10.6044	11.0575	12.1208	11.7938
Asparagine	0.0181772	0.0230147	0.0338412	0.028053	0.00664175	0.003076	0.0105034	0.00395388	0.2395	0.1344	0.0187	0.0645	0.061	0.0959	0.095	0.1004
L-Homoserine	0.0027	0.0015	0.0021	0.0026	0.0007	0.0007	0.0008	0.0007	0.3645	0.0857	0.0925	0.1804	1.0474	1.0044	1.0056	0.9018
L-Allothreonine	0.0175	0.0148	0.0171	0.0212	0.0113	0.018	0.0221	0.0214	2.679	2.4357	2.6251	2.0097	0.7146	0.7342	1.0703	0.7402
Serine	0.00199386	0.00168179	0.00203368	0.001833	0.00187192	0.00144673	0.00117643	0.001741	1.0078	1.0897	1.0253	0.4754	0.8355	0.5938	0.7403	0.5311
Proline	0.0027	0.0025	0.0025	0.0031	0.0021	0.0019	0.0021	0.0022	0.1867	0.2147	0.1912	0.2704	0.4882	0.5607	0.5135	0.428
Alanine	0.0006	0.0005	0.0006	0.0005	0.0007	0.0007	0.0008	0.0008	4.1198	5.855	4.9773	5.2615	25.7475	24.8483	25.8975	22.6261
Glycine	0.320768	0.300521	0.19187	0.317293	0.583891	0.428713	0.634426	0.377337	7.6488	5.0891	6.7098	7.2998	3.798	4.861	4.6907	4.9845
Phenylalanine	0.124631	0.0979406	0.105666	0.124049	0.107615	0.0982487	0.0959988	0.107288	2.7245	1.5482	1.737	1.5455	0.501	0.79	0.4623	1.0053
4-Aminobutyric Acid	0.0053	0.0048	0.0057	0.0052	0.0034	0.0028	0.0038	0.003	2.6443	2.4176	2.3495	2.0503	2.1847	2.3385	3.3771	3.0313
Ethanolamine	0.434956	0.734078	0.575121	0.473246	0.964042	0.923665	0.899957	0.65725	16.1794	15.8326	13.694	15.5266	7.4668	8.6408	8.8515	9.0422
D-Mannosamine	0.115	0.127	0.1103	0.1007	0.0576	0.0666	0.0793	0.0843	0.015	0.0043	0.0159	0.2185	0.0693	0.0367	0.1054	0.0902
Sphingosine	0.0221	0.0146	0.0183	0.0153	0.0199	0.0224	0.0241	0.0269	2.2029	3.4646	3.6155	3.0246	3.0128	4.3256	2.0321	2.0317
3-Aminoisobutyric Acid	0.3554	0.4812	0.3749	0.4156	0.1401	0.2284	0.2769	0.2558	0.2145	0.2891	0.205	0.2448	0.2346	0.2831	0.2046	0.2854
5-Aminovaleric Acid	4.9444	4.6733	4.4265	4.2974	0.6164	0.6881	0.844	1.0322	0.5037	0.2289	0.2163	0.2198	0.4486	0.55	0.6226	0.839
2-Hydroxypyridine	0.0686	0.0734	0.074	0.073	0.0052	0.0046	0.006	0.0419	7.1188	8.9729	6.179	6.5112	7.5209	8.0202	7.8706	6.8955
Sucrose	0.0011	0.0007	0.0005	0.0007	0.0002	0.0003	0.0011	0.0013	1.3273	1.0535	1.0576	1.7606	4.0386	5.9622	5.2801	5.827
Maltose	0.0032	0.0032	0.0029	0.0038	0.0028	0.0029	0.0028	0.0028	0.3414	0.2079	0.382	0.2509	1.4537	1.8586	1.1925	1.4306
Maltotriose	0.0094	0.0093	0.0094	0.0091	0.0105	0.0096	0.0089	0.0094	0.0517	0.1038	0.0916	0.1005	0.0015	0.1495	0.0018	0.0574
Melezitose	0.356682	0.280682	0.191081	0.295395	0.173253	0.218867	0.207199	0.216116	0.0559	0.0841	0.0363	0.0442	1.0006	2.0306	1.1218	1.0256
Threitol	0.0303	0.0321	0.0213	0.0188	0.0206	0.0114	0.0184	0.0182	0.2665	0.2903	0.2806	0.3026	0.7939	1.0597	1.3045	1.5397
Galactinol	0.007	0.007	0.0073	0.0072	0.0074	0.0031	0.0083	0.0019	0.7026	1.0669	0.827	1.0939	1.0206	0.9648	1.0929	1.0397
Glycerol	0.0182	0.0159	0.0186	0.0237	0.0044	0.0086	0.0242	0.0252	8.4526	7.6582	8.9586	8.267	7.5663	8.4934	5.0558	5.5397
Myo-Inositol	0.0028	0.0031	0.0038	0.0027	0.0035	0.0016	0.0017	0.0021	44.1717	44.8791	42.2688	43.5402	1.9384	2.6234	2.7075	1.3168
L-Threose	0.5271	0.5413	0.5632	0.5335	0.6066	0.6081	0.5756	0.636	0.0824	0.0926	0.0702	0.0719	0.0414	0.018	0.0167	0.0234
Xylose	0.001	0.0009	0.0009	0.0009	0.0003	0.0009	0.0019	0.0014	1.4568	1.0084	1.7817	1.0505	2.0474	1.4399	0.9197	1.0862
Cellobiose	1.0522	0.7757	1.0649	1.0377	0.5202	0.6048	0.6209	0.6417	0.0443	0.0446	0.0297	0.0546	0.2895	0.2192	0.3813	0.3417
Lactulose	2.2061	1.9833	1.602	2.0199	0.02	0.0075	0.0086	0.165	0.26	0.263	0.4007	0.3797	1.751	3.0306	1.0501	1.0099
D-Arabitol	0.5729	0.3598	0.0202	0.0408	1.0563	1.0232	0.7751	1.008	1.738	2.8435	2.9492	1.5743	1.3668	0.9834	1.054	1.3081
Glucose-6-Phosphate	3.2407	3.0686	2.9475	3.0175	1.9774	1.8266	2.515	2.3343	0.0311	0.0339	0.0385	0.0304	0.032	0.0201	0.0194	0.035
Fructose 2,6-Biphosphate	0.001	0.0008	0.0006	0.0008	0.0024	0.0036	0.0024	0.0028	0.2186	0.1111	0.1193	0.1686	0.1036	0.0272	0.0447	0.1091
Maltose	1.583	1.0668	2.1075	1.2374	2.0339	2.4262	2.0274	3.106	0.2144	0.2634	0.3028	0.2082	0.4004	0.3569	0.917	0.7675
Glycolic Acid	7.1423	8.4985	8.109	8.5999	3.7945	4.1227	4.0419	4.0857	0.1072	0.1191	0.1241	0.1163	1.0628	0.5264	1.0553	0.3278
Lactic Acid	0.2086	0.1283	0.1219	0.1274	0.1337	0.0948	0.1371	0.2589	4.0092	2.2648	3.0482	2.5734	3.299	3.2372	3.4571	3.8724
Methylmalonic Acid	0.6993	0.6857	0.4264	0.3718	0.0628	0.0564	0.0794	0.0513	0.1161	0.1096	0.132	0.1135	0.0683	0.0672	0.0751	0.1069
Mucic Acid	0.1387	0.2284	0.2058	0.2388	0.1277	0.1793	0.0898	0.1229	1.0483	1.8422	1.3875	1.5297	2.011	1.9281	1.8283	1.6086
D-Glyceric Acid	0.0032	0.0025	0.0032	0.0045	0.0056	0.0042	0.0031	0.0043	2.0558	3.0044	2.1358	2.8732	3.2817	1.7811	1.1408	1.0454
Pyruvic Acid	0.0014	0.0023	0.0021	0.0024	0.0013	0.0018	0.0009	0.0012	1.7023	2.0243	1.9927	2.0096	3.8869	3.5007	4.4919	5.7725
Succinic Acid	0.003	0.0022	0.0024	0.0024	0.0037	0.0031	0.0034	0.0028	8.1849	7.9135	5.1569	6.626	7.2773	6.6291	7.0827	5.148
Fumaric Acid	0.0522	0.0299	0.0439	0.0542	0.0323	0.0192	0.0246	0.0201	3.1778	3.0083	3.0492	3.085	19.3825	27.5127	27.2899	27.2579
Citramalic Acid	7.978	7.0914	6.6395	6.5298	1.0882	1.0777	1.0338	1.1419	0.3874	0.4329	0.4727	0.4878	0.1181	0.3128	0.1426	0.1436
Oxalic Acid	0.000199978	0.00024524	0.000163765	0.000216814	0.000258629	0.000225385	0.000205147	0.000127409	0.2603	0.1996	0.2415	0.2773	0.1161	0.2107	0.1338	0.2356
Itaconic Acid	0.0103	0.0072	0.0113	0.0101	0.0072	0.0076	0.0084	0.0081	3.1648	2.7829	2.3411	3.984	2.1739	2.9914	2.7105	1.429
Malonic Acid	0.0258	0.0267	0.0311	0.0325	0.0337	0.0243	0.0272	0.0711	1.1195	0.9803	1.1227	1.2546	9.6671	8.2025	10.7132	10.2542
Maleic Acid	0.0467	0.0427	0.045	0.0443	0.0411	0.0657	0.0556	0.0568	7.8717	5.9865	7.1996	6.9071	7.019	8.5286	10.5773	10.8298
Gluconic Acid	0.0017	0.0003	0.0008	0.0005	0.0018	0.0014	0.0021	0.0018	0.0777	0.0595	0.0724	0.0785	0.0427	0.102	0.109	0.0681
Nicotinic Acid	0.0041	0.006	0.0059	0.0063	0.0076	0.0078	0.0072	0.0087	0.7767	0.7509	0.6019	0.6485	1.0621	1.0267	1.2333	1.6973
Threonic Acid	0.0448	0.0466	0.0387	0.0678	0.1089	0.1147	0.0829	0.0888	2.05	1.1126	1.1669	1.4452	0.5992	0.5447	1.0792	1.0026
Galactonic Acid	0.0255	0.0161	0.0225	0.0251	0.0066	0.0063	0.0069	0.0091	1.021	1.03	1.0929	0.9103	0.9098	1.2053	1.2939	1.0841
Glucoheptonic Acid	0.0081	0.0082	0.0081	0.0098	0.0047	0.0049	0.0052	0.0056	0.2725	0.1657	0.2697	0.1586	0.5897	0.5877	0.5029	0.5577
3-Hydroxypropionic Acid	0.041	0.0405	0.0402	0.0401	0.0327	0.0396	0.0376	0.0367	0.1921	0.1904	0.1549	0.208	0.1095	0.1685	0.1242	0.161
Shikimic Acid	0.0062	0.009	0.0157	0.0211	0.0019	0.0019	0.0075	0.0029	4.4568	3.5083	3.9492	3.685	2.9474	1.0146	1.1667	2.5397
Stearic Acid	0.1837	0.1377	0.1534	0.1742	0.0948	0.0737	0.0944	0.0896	0.2389	0.2774	0.2421	0.1912	0.321	0.3675	0.2703	0.2551
Palmitic Acid	0.004	0.002	0.0017	0.002	0.0006	0.0013	0.0011	0.0013	0.2257	0.4589	0.2186	0.3626	0.3284	0.2545	0.8629	0.3188
Linolenic Acid	0.4596	0.4082	0.3501	0.475	0.4264	0.4254	0.3981	0.3504	1.3053	1.6441	1.3833	1.8045	0.2224	0.1368	0.1896	0.1851
Linoleic Acid	0.0013339	0.00102991	0.000401839	0.00386037	0.00387874	0.000601775	0.000427539	0.000510681	1.1472	2.0491	2.8465	1.2181	2.1177	2.3913	2.0101	2.8465
Ferulic Acid	0.0933679	0.0927898	0.0653759	0.0874604	0.141157	0.106688	0.151785	0.13321	2.0997	1.1144	1.9492	1.1468	0.6376	1.124	0.7365	1.1024
Neohesperidin	0.0395254	0.0382976	0.0380866	0.0491175	0.0206729	0.0299215	0.02958	0.0284369	0.1323	0.0994	0.1903	0.1685	0.2168	0.0203	0.286	3.5397
Salicylic Acid	0.103706	0.110846	0.128488	0.0981929	0.0524483	0.0493605	0.0828681	0.104803	0.3529	0.3841	0.3554	0.4851	0.0218	0.0467	0.0227	0.1146
Prunin	0.0012	0.0013	0.0011	0.0015	0.0018	0.0008	0.0024	0.0023	0.1079	0.0589	0.1029	0.0817	0.2133	0.2104	0.2002	0.2818
Caffeic Acid	0.121713	0.13706	0.157025	0.122492	0.268129	0.303314	0.515335	0.362259	0.0124	0.0181	0.0234	0.0103	0.0022	0.0023	0.0123	0.0163
