# Supplementary material for: Comparative study of leaf nutrient reabsorption by two different ecotypes of wild soybean under low-nitrogen stress
Source: PeerJ. 2023 Jun 27;11:e15486. doi: 10.7717/peerj.15486 (PMC10312162; doi:10.7717/peerj.15486)
Supplement: Supplemental Information 11 [file peerj-11-15486-s011.xlsx]

## Sheet: Sheet 1
	W1								W2
Metabolite name	CK1	CK2	CK3	CK4	LN1	LN2	LN3	LN4	CK1	CK2	CK3	CK4	LN1	LN2	LN3	LN4
Proline	0.100867	0.110985	0.109963	0.129416	0.811027	1.07513	1.06107	0.308022	1.84568	1.21948	1.43116	1.39352	0.590985	0.76804	0.600313	0.66558
Glycine	0.733806	1.07346	0.995481	1.46106	0.591883	1.99561	0.995001	1.49245	0.0856114	0.062895	0.100061	0.0517648	0.0465914	0.0524493	0.0415564	0.0390481
Sarcosine	0.815138	0.406854	1.09328	0.910402	2.96725	3.45456	1.23798	4.20921	0.234479	0.219423	0.139476	0.216976	0.138143	0.135111	0.138947	0.129612
L-Homoserine	1.17063	0.753895	0.638833	1.57722	2.81325	2.8909	1.86712	2.09869	0.192776	0.171499	0.205705	0.186514	0.14932	0.152429	0.146807	0.148724
L-Aspartic acid	0.0030603	0.053179	0.180458	0.038484	0.551664	0.198108	0.385991	0.196521	0.216939	0.200014	0.204218	0.203064	0.182479	0.182664	0.194202	0.185412
L-Alanine	0.06307	0.08632	0.114658	0.088016	0.269957	0.284695	0.307774	0.182821	0.0156104	0.0446238	0.0198818	0.0193509	0.0286633	0.0310612	0.0214965	0.0218661
Asparagine	0.028268	0.057314	0.050813	0.090208	0.340383	0.087417	0.231743	0.219022	0.0912789	0.101161	0.102338	0.0908333	0.107449	0.118287	0.115556	0.105999
L-Valine	30.8489	47.3138	31.436	38.9103	34.4143	60.2883	43.0431	52.0885	2.17261	2.28874	2.34097	1.64165	1.64761	1.99263	2.27439	3.79263
Cycloleucine	33.558	40.1683	34.2475	15.5957	55.4564	47.3555	55.9837	18.7065	0.680463	0.566687	0.503257	0.268963	0.371842	0.419891	0.661883	1.09041
Isoleucine	0.356264	0.396854	0.405044	0.372275	1.78579	1.37363	1.52345	0.624267	0.174918	0.203862	0.293985	0.211396	0.0818008	0.629654	0.129912	0.355239
Beta-Alanine	0.122183	0.0302102	0.0423745	0.333639	0.0783032	0.0709223	0.0707921	0.0413873	0.0566912	0.0643253	0.0746008	0.0339013	0.0361345	0.0471729	0.126141	0.125502
L-Phenylalanine	0.049298	0.175178	0.033804	0.071038	0.218949	0.119768	0.195295	0.127064	0.141482	0.13123	0.157559	0.170221	0.280684	0.222026	0.271026	0.151348
L-Serine	0.011412	0.013919	0.014013	0.009831	0.061597	0.035947	0.103372	0.045473	11.5356	9.06792	7.61029	5.68315	15.5296	9.0492	16.4943	19.3026
Threonine	0.015545	0.012818	0.012958	0.020859	0.053778	0.038251	0.011932	0.018184	0.0583727	0.0562674	0.0578526	0.0456043	0.0426581	0.06277	0.148995	0.148986
Sphingosine	7.26752	8.29487	7.23094	2.34466	0.207882	0.584031	5.55784e-08	0.871501	1.29026	0.43355	0.189148	0.340894	0.849841	1.09636	0.553443	0.059466
4-Aminobutyric acid	1.23467	4.61362	1.56284	0.560665	0.946485	0.75915	1.02426	0.522421	0.368917	0.355335	0.302135	0.343835	0.44651	0.397218	0.426037	0.381516
Ethanolamine	25.064	36.5966	16.8683	44.8853	69.9932	73.1808	56.1354	46.013	0.687226	0.349312	0.910173	0.348995	0.0844637	1.52795	2.77072	0.242625
5-Aminopentanoic acid	0.732736	1.15643	0.572537	0.451177	0.0273227	0.0189543	0.0623227	4.15392e-08	0.00179871	0.00447232	4.13089e-08	0.00327022	0.0293335	0.0237612	0.00421223	0.00183122
D-Galactose	0.029813	0.040676	0.044776	0.096643	0.073655	0.079655	0.094642	0.058667	0.0353759	0.0487166	0.0180497	0.0160768	0.0111878	5.49531e-08	0.00429815	0.00433191
Lactose	0.18027	0.147941	0.441139	0.0836572	0.0375301	0.03506	5.55784e-08	0.0482049	0.0871211	0.08272	0.0599688	0.0865192	0.0372638	0.0891444	0.020339	0.0175861
Gluconic acid	0.082429	0.11453	0.091478	0.099048	0.446685	0.499326	0.103624	0.328064	0.0285423	0.0289649	0.0292116	3.29627e-08	0.00495314	0.0255263	0.00994921	0.0138409
L-Threose	4.15332	3.52515	4.28106	4.65375	4.96104	2.93199	6.52694	5.42419	0.00436294	0.00429429	0.00571216	0.00646106	0.00288804	0.0100887	0.00335488	0.00500468
Maltose	0.064083	0.09779	0.094438	0.205596	0.317194	0.165743	0.275219	0.110674	0.217097	0.220291	0.316855	0.26145	0.13081	0.526215	0.332801	0.122682
Xylose	6.03545	6.22177	6.81285	6.35669	7.25591	6.23625	18.6311	10.7078	0.0413299	0.0309116	0.051519	0.0693991	0.0308502	0.139381	0.0294682	0.0311014
Sucrose	36.167	5.97372	50.2766	30.8058	2.21978	2.52443	3.18797	2.64406	0.61439	0.757767	0.995704	1.35109	1.61088	1.04432	1.30506	2.04154
Glycerol	0.101589	0.095881	0.084493	0.124391	0.20336	0.185245	0.1995	0.196035	0.0169166	0.0142089	0.0223628	0.0203374	0.0345184	0.0558551	0.0105682	0.0354948
D-Arabitol	0.110498	0.137824	0.094964	0.138526	0.761452	0.542901	0.678669	0.285036	0.523853	0.398309	0.434799	0.576354	6.46158	2.89979	1.26124	1.45723
Malonic acid	1.06425	1.13992	0.995687	0.578098	0.345426	0.388656	0.384234	0.718148	1.15194	0.888233	1.07704	0.465133	0.905484	0.865892	0.575098	0.70198
Palmitic acid	0.300365	0.236822	0.22434	0.324682	1.31333	0.343509	1.21696	0.398568	0.0390386	0.0480363	0.0210866	0.0439762	0.0157415	0.0196575	0.0131709	0.0177012
Stearic acid	2.19392	1.84745	1.91586	1.70732	4.55557	3.47566	3.91381	2.06456	0.234091	0.260599	0.227832	0.248552	0.196951	0.196701	0.195571	0.182323
Pelargonic acid	0.0264369	0.0111661		0.0145771	0.0145406	0.0234782	0.0228725	0.0228946	0.0146016	0.0142994	0.0158254	0.0151654	0.013	0.0133388	0.0125949	0.0123954
Linoleic acid	7.44617	5.96782	4.28947	15.5158	23.744	22.7833	19.6588	21.9484	0.00420789	0.00400561	0.004	0.00404968	0.0035829	0.003557	0.00379094	0.00377607
Linolenic acid	2.84396	4.04893	2.25066	3.63533	2.05708	2.29892	2.13761	3.46855	13.6836	18.2829	26.3514	22.7705	13.3716	19.108	26.5057	27.2359
Fructose 6-phosphate	0.074496	0.062124	0.053213	0.063278	0.130714	0.149547	0.15188	0.170714	0.0475571	0.0751425	0.0775668	0.0900924	0.0453689	0.0439616	0.0441303	0.0423884
Pyruvic acid	0.326886	0.165483	0.543834	0.330996	0.877172	0.570925	0.811805	1.12207	0.0170357	0.0218151	0.0123039	0.0187666	0.0291948	0.0332531	0.0338243	0.0374794
Glucose 6-phosphate	0.596067	1.3298	0.912344	0.9726	1.93779	1.55161	1.79224	0.929281	0.031296	3.74229e-08	0.0439168	0.0219184	0.0490858	0.0511427	0.146143	0.110595
Fumaric acid	0.025126	0.049568	0.100231	0.071096	0.08094	0.055971	0.07106	0.058451	0.0812096	0.0790008	0.0819148	0.0796654	0.0607668	0.0924846	0.0300582	0.0416883
L-Malic acid	2.84784	4.86995	3.60524	2.21724	8.31772	6.00845	4.77074	2.07265	0.161649	0.153145	0.152703	0.151058	0.21036	0.208045	0.213884	0.211681
Succinic acid	6.62256	4.4306	4.37221	9.90759	11.3101	10.3327	7.93535	10.6732	1.15304	0.737454	0.966276	1.41099	1.67598	2.49281	2.14246	2.65905
Itaconic acid	0.936005	0.603002	0.576512	0.544063	0.104227	0.0959002	0.0946851	0.0586582	0.0887014	0.0780361	0.0784985	0.067512	0.0611433	0.0918453	0.0558279	0.0938645
Lactic acid	0.613482	0.759766	0.894355	0.486962	0.679764	1.44122	0.846656	0.762192	0.0721349	0.0729699	0.0742241	0.0722845	0.078548	0.0772299	0.0781752	0.0772092
Maleic acid	0.970651	1.58655	1.9574	2.40918	5.05756	19.1864	9.16354	3.39534	2.41317	1.23637	1.34245	1.92743	2.19535	2.39996	3.02153	2.81655
Caffeic acid	5.74566	5.46783	6.25044	8.46621	5.10775	6.20339	5.50874	3.64549	0.0377355	0.02	0.0337276	0.0263005	0.0436852	0.0447387	0.0534204	0.0451504
Glycolic acid	0.249064	0.338178	0.294232	0.233658	0.13384	0.0683906	0.153876	0.122658	0.0987248	0.100798	0.105756	0.167449	0.239859	0.232024	0.292458	0.363207
Galactaric acid	0.832403	0.716412	2.08935	0.556452	1.73774	1.11461	1.53349	1.30382	0.593938	0.93258	0.540735	0.432735	1.98611	1.94525	1.02117	1.01987
Benzoic acid	0.0214046	0.0256865	0.01689	0.0375562	0.0243794	0.0217327	0.0209624	0.013108	0.0180018	0.0164994	0.019961	3.29627e-08	0.110865	0.080601	0.129438	0.240753
Glyceric acid	13.596	9.65839	4.66777	11.566	19.2882	19.9798	14.6705	8.91002	2.8978e-05	0.000117532	2.40811e-05	8.81987e-05	0.00191224	0.00110084	0.00102394	0.000670552
Shikimic acid	0.0793204	0.0793204	0.0793204	0.0793204	0.125463	0.145045	0.177769	0.131864	0.177208	0.205666	0.193635	0.201784	0.110358	0.277363	0.0835366	0.111186
Ferulic acid	0.481834	0.522134	0.341475	0.538598	0.362281	0.283099	0.345156	0.243413	0.0437526	0.0244952	0.0576098	0.120008	0.231927	0.245043	0.132911	0.0180942
Salicylic acid	2.58322	2.07863	1.69696	2.748	7.64582	10.6852	8.56416	3.89023	0.0174236	0.0165403	0.0198665	0.0139107	0.00471969	0.014012	0.0288543	0.0409964
Prunin	1.36069	3.47302	3.07706	1.71145	11.2173	5.47055	3.44446	2.2913	0.0396328	0.0413062	0.0397196	0.0261445	0.012868	0.043566	0.0127183	0.0141125
Neohesperidin	0.156555	0.152048	0.109219	0.264186	1.90665	0.74327	1.19722	1.24224	0.0664002	0.315521	0.16022	0.239718	0.85322	0.22134	0.0328265	0.0526786
Vanillin	0.00803112	0.00803112	0.00803112	0.00803112	0.133852	0.189339	0.269822	0.723823	1.65191	1.25459	4.13089e-08	3.29627e-08	2.19011	2.6808	1.65811	0.725897
